# Supplementary material for: Postoperative Cerebral Venous Sinus Thrombosis Following a Retrosigmoid Craniotomy—A Clinical and Radiological Analysis
Source: MDPI journal article supplement (doi:10.3390/brainsci13071039), 2023-07-07
Supplement: s1 [file s1]

**Supplementary Table S1.** Surgical and postoperative characteristics of 130 patients included in the study. Values are n (%) or the median (range), as indicated. N/A – not applicable

| Characteristic                             | Data           | p-value |
|--------------------------------------------|----------------|---------|
| <b>Sex</b>                                 |                | 0.02    |
| male                                       | 51 (39.2%)     |         |
| female                                     | 79 (60.8%)     |         |
| <b>Age (years)</b>                         |                | N/A     |
| median (range)                             | 46.0 (20 – 82) |         |
| 1 <sup>st</sup> , 3 <sup>rd</sup> quartile | 36, 57.75      |         |
| <b>Diagnosis</b>                           |                | N/A     |
| Vestibular schwannoma, including:          | 109 (83.85%)   |         |
| neurofibromatosis type 2                   | 3 (2.31%)      |         |
| vestibular schwannoma and meningioma       | 2 (1.54%)      |         |
| Meningioma, including:                     | 15 (11.54%)    |         |
| Petroclival                                | 7 (5.38%)      |         |
| Sphenopetroclival                          | 2 (1.54%)      |         |
| Glossopharyngeal schwannoma                | 1 (0.77%)      |         |
| Facial schwannoma                          | 1 (0.77%)      |         |
| Glioblastoma                               | 1 (0.77%)      |         |
| Cavernous malformation                     | 1 (0.77%)      |         |

|                                                                                       |                            |      |
|---------------------------------------------------------------------------------------|----------------------------|------|
| Metastasis                                                                            | 1 (0.77%)                  |      |
| Unknown histopathology                                                                | 1 (0.77%)                  |      |
| <b>Side</b>                                                                           |                            | 0.86 |
| right                                                                                 | 64 (49.3%)                 |      |
| left                                                                                  | 66 (50.7%)                 |      |
| <b>Tumor</b>                                                                          |                            | N/A  |
| maximal size: median (range), 1 <sup>st</sup> , 3 <sup>rd</sup> quartile              | 31.5 (9 – 57), 22.25, 39   |      |
| (mm)                                                                                  | 11.25 (0.18 – 59.9), 3.82, |      |
| volume: median (range), 1 <sup>st</sup> , 3 <sup>rd</sup> quartile (cm <sup>3</sup> ) | 21.57                      |      |

**Supplementary Table S2.** Characteristics of patients diagnosed with clinical cerebral venous sinus thrombosis. PMH —past medical history, SSS —superior sagittal sinus, VS —vestibular schwannoma

| Characteristics                  | Patient 1    | Patient 2    | Patient 3    | Patient 4         |
|----------------------------------|--------------|--------------|--------------|-------------------|
| Age, sex                         | 41, female   | 46, female   | 66, male     | 42, female        |
| Diagnosis                        | VS           | meningioma   | metastasis   | VS and meningioma |
| Side                             | right        | right        | left         | left              |
| Sinus dominance                  | right        | left         | right        | left              |
| Tumor size, mm                   | 18 x 11 x 12 | 14 x 12 x 10 | 40 x 35 x 33 | 25 x 15 x 20      |
| (volume, cm <sup>3</sup> )       | (1.24)       | (0.88)       | (24.2)       | (3.9)             |
| Distance to the transverse sinus | -10.05       | -2.4         | -6.5         | -10.55            |
| Exposure of the transverse sinus | exposed      | exposed      | exposed      | exposed           |
| Distance to the sigmoid sinus    | -7           | 0            | -5.55        | -2.7              |
| Exposure of the sigmoid sinus    | exposed      | hidden       | exposed      | exposed           |
| Transverse sinus thrombosis      | no           | yes          | yes          | yes               |
| Sigmoid sinus thrombosis         | no           | yes          | yes          | yes               |

|                         |          |            |               |                     |
|-------------------------|----------|------------|---------------|---------------------|
| Junction of sinuses     | no       | yes        | yes           | yes                 |
| thrombosis              |          |            |               |                     |
| Distant thrombosis of   | yes, SSS | no         | no            | no                  |
| other sinuses           |          |            |               |                     |
| Intraparenchymal        | no       | yes        | yes           | no                  |
| hematoma                |          |            |               |                     |
| Injuries of the sinuses | no       | no         | no            | no                  |
| Risk factors            | no       | no         | smoking,      | overweight/obesity, |
|                         |          |            | oncologic PMH | oncologic PMH       |
| Postoperative           |          |            |               |                     |
| headaches refractory to | yes      | yes        | no            | no                  |
| regular medical         |          |            |               |                     |
| treatment               |          |            |               |                     |
| Outcome                 | death    | discharged | discharged    | to discharged home  |
|                         |          | home       | neurology     |                     |
|                         |          |            | department    |                     |

---

**Supplementary Table S3.** Literature review on the cerebral venous sinus thrombosis after cerebellopontine angle surgery.

Abbreviations: CPA – cerebellopontine angle, MF – middle fossa, N/A – not applicable, RS – retrosigmoid, TL – translabyrinthine, TP – transpetrosal, VS – vestibular schwannoma

| Author, year            | Study type                   | Incidence (%) | Diagnosis             | Approach                     |
|-------------------------|------------------------------|---------------|-----------------------|------------------------------|
|                         |                              |               |                       | RS, TL, suboccipital,        |
| Benjamin, 2019 [14]     | prospective, single center   | 24/74 (32.4)  | tumor near sinus      | supratentorial               |
| Guazzo, 2019 [18]       | prospective, multicenter     | 21/54 (38.9)  | VS                    | TL                           |
| Ohata, 1998 [20]        | retrospective, single center | 7/143 (4.9)   | undisclosed           | presigmoid TP                |
| Keiper, 1999 [33]       | retrospective, single center | 4/105 (4.7)   | undisclosed           | RS, TL                       |
| Moore, 2014 [13]        | retrospective, single center | 5/43 (11.6)   | CPA tumor             | RS, TL, MF                   |
|                         |                              |               |                       | midline, paramedian, lateral |
| Apra, 2017 [16]         | retrospective, single center | 12/180 (6.7)  | posterior fossa tumor | suboccipital                 |
| Jean, 2017 [34]         | retrospective, single center | 10/52 (19.2)  | undisclosed           | TL, posterior petrosectomy   |
| Abou-Al-Shaar, 2018 [7] | retrospective, single center | 7/116 (6.03)  | VS                    | RS, TL, MF                   |
| Shew, 2018 [24]         | retrospective, single center | 22/127 (17.3) | CPA tumor             | TL, RS, MF                   |

|                         |                              |                |                       |                     |
|-------------------------|------------------------------|----------------|-----------------------|---------------------|
| Yen Kow, 2020 [26]      | retrospective, single center | 20/126 (15.9)  | CPA tumor             | RS, TL, subtemporal |
| Orlev, 2020 [25]        | retrospective, single center | 26/538 (4.8)   | posterior fossa tumor | RS, TL, other       |
| Ziegler, 2020 [35]      | retrospective, single center | 1/128 (0.8)    | VS                    | RS, TL              |
| Gerges, 2021 [15]       | retrospective, single center | 10/61 (61.4)   | VS                    | TL                  |
| Krystkiewicz, 2022 [36] | retrospective, single center | 26/116 (22.4%) | VS                    | RS                  |
| current study           | retrospective, single center | 61/130 (46.9%) | posterior fossa tumor | RS                  |

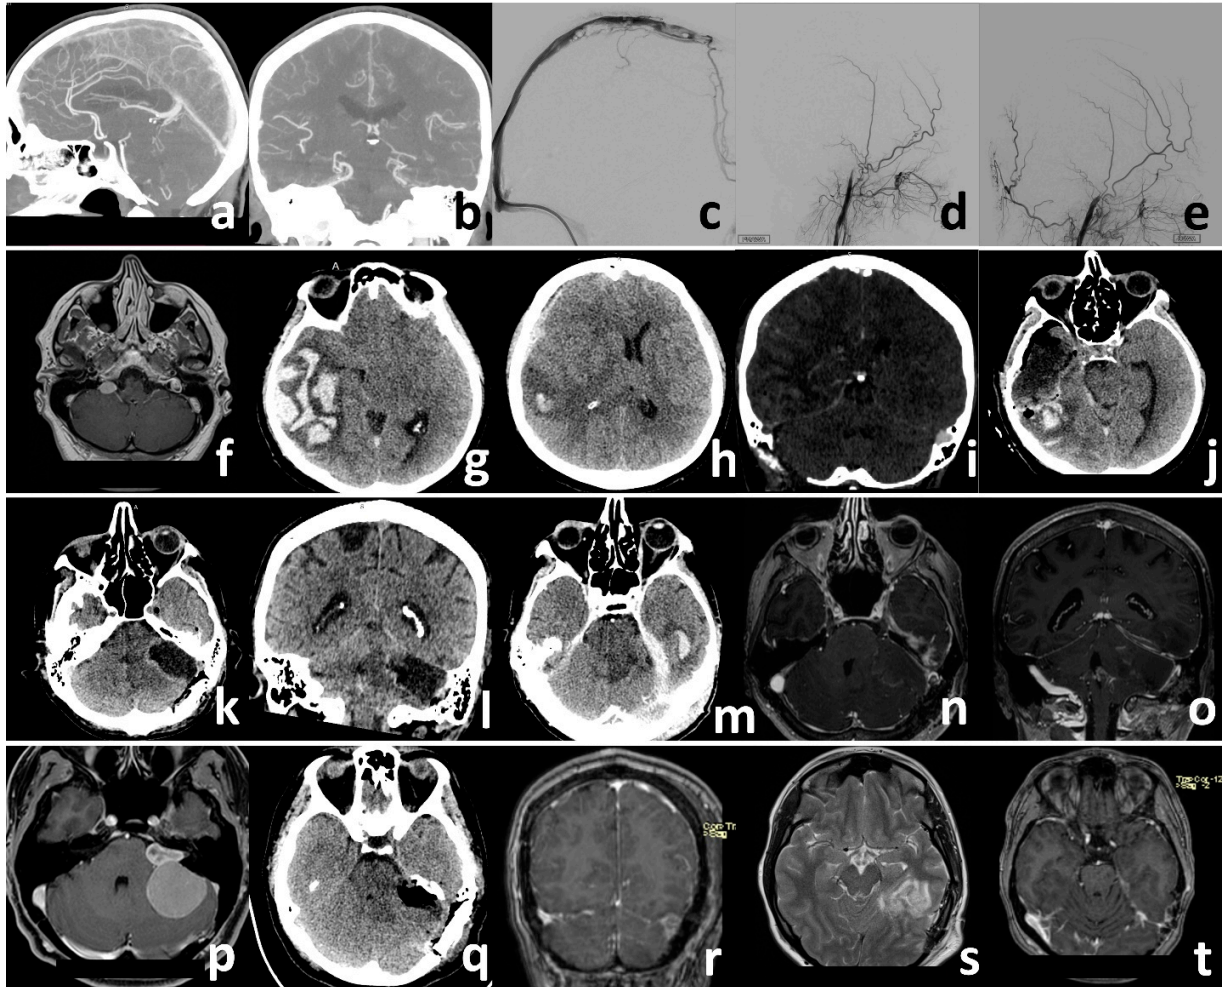

**Supplementary Figure S1.** Radiologic images of patients diagnosed with clinical cerebral venous sinus thrombosis.

Patient 1 (a – e) Sagittal and coronal maximum intensity projections of CT angiography (a and b) of first patient visualize superior sagittal sinus thrombosis after retrosigmoid craniotomy for a vestibular schwannoma resection. After unsuccessful endovascular treatment (c) the patient died in the intensive care unit. The lateral views of right and left common carotid artery angiography injections (d and e) prior to death are significant for lack of internal carotid arteries flow.

Patient 2 (f – j) Preoperative T1-weighted axial MRI scan (f) visualize a right cerebellopontine angle tumor which was confirmed as a meningioma in the second patient. An intraparenchymal hematoma in the right temporal lobe (g) causing a mass effect and a midline shift (h) is shown in postoperative axial CT images. A coronal CT angiography is significant for right lateral sinus thrombosis. The patient underwent successful surgical removal of a hematoma, as presented on the axial CT scan (j).

Patient 3 (k – o) A satisfactory early postoperative CT axial and coronal scans (k and l) of a patient who underwent left retrosigmoid craniotomy. However, routine postoperative contrast enhanced CT scan visualized a small intraparenchymal hemorrhage in the basal part of the ipsilateral temporal lobe (m). A

subsequent contrast enhanced T1-weighted MRI axial and coronal scans (n and o) confirmed cerebral venous sinus thrombosis.

Patient 4 (p – t) Preoperative contrast enhanced T1 –weighted MRI axial scan (p) shows an unusual coincidence of a meningioma and vestibular schwannoma in the left cerebellopontine angle. Because of neurological deterioration in the second postoperative day the patient had an MRI and was diagnosed with cerebral venous sinus thrombosis, as can be seen on a coronal contrast enhanced T1-weighted MRI scan (r). A small intraparenchymal hemorrhage in the adjacent temporal lobe was visualized on axial T2-weighted MR image (s), which resolved in follow-up (contrast enhanced T1 -weighted MRI scan, t).
